# Supplementary figures and images for: Electrochemical oxidation of trivalent americium using a dipyrazinylpyridine modified ITO electrode
Source: Royal Society of Chemistry journal article supplement (doi:10.1039/c9cc00837c), 2019-01-01

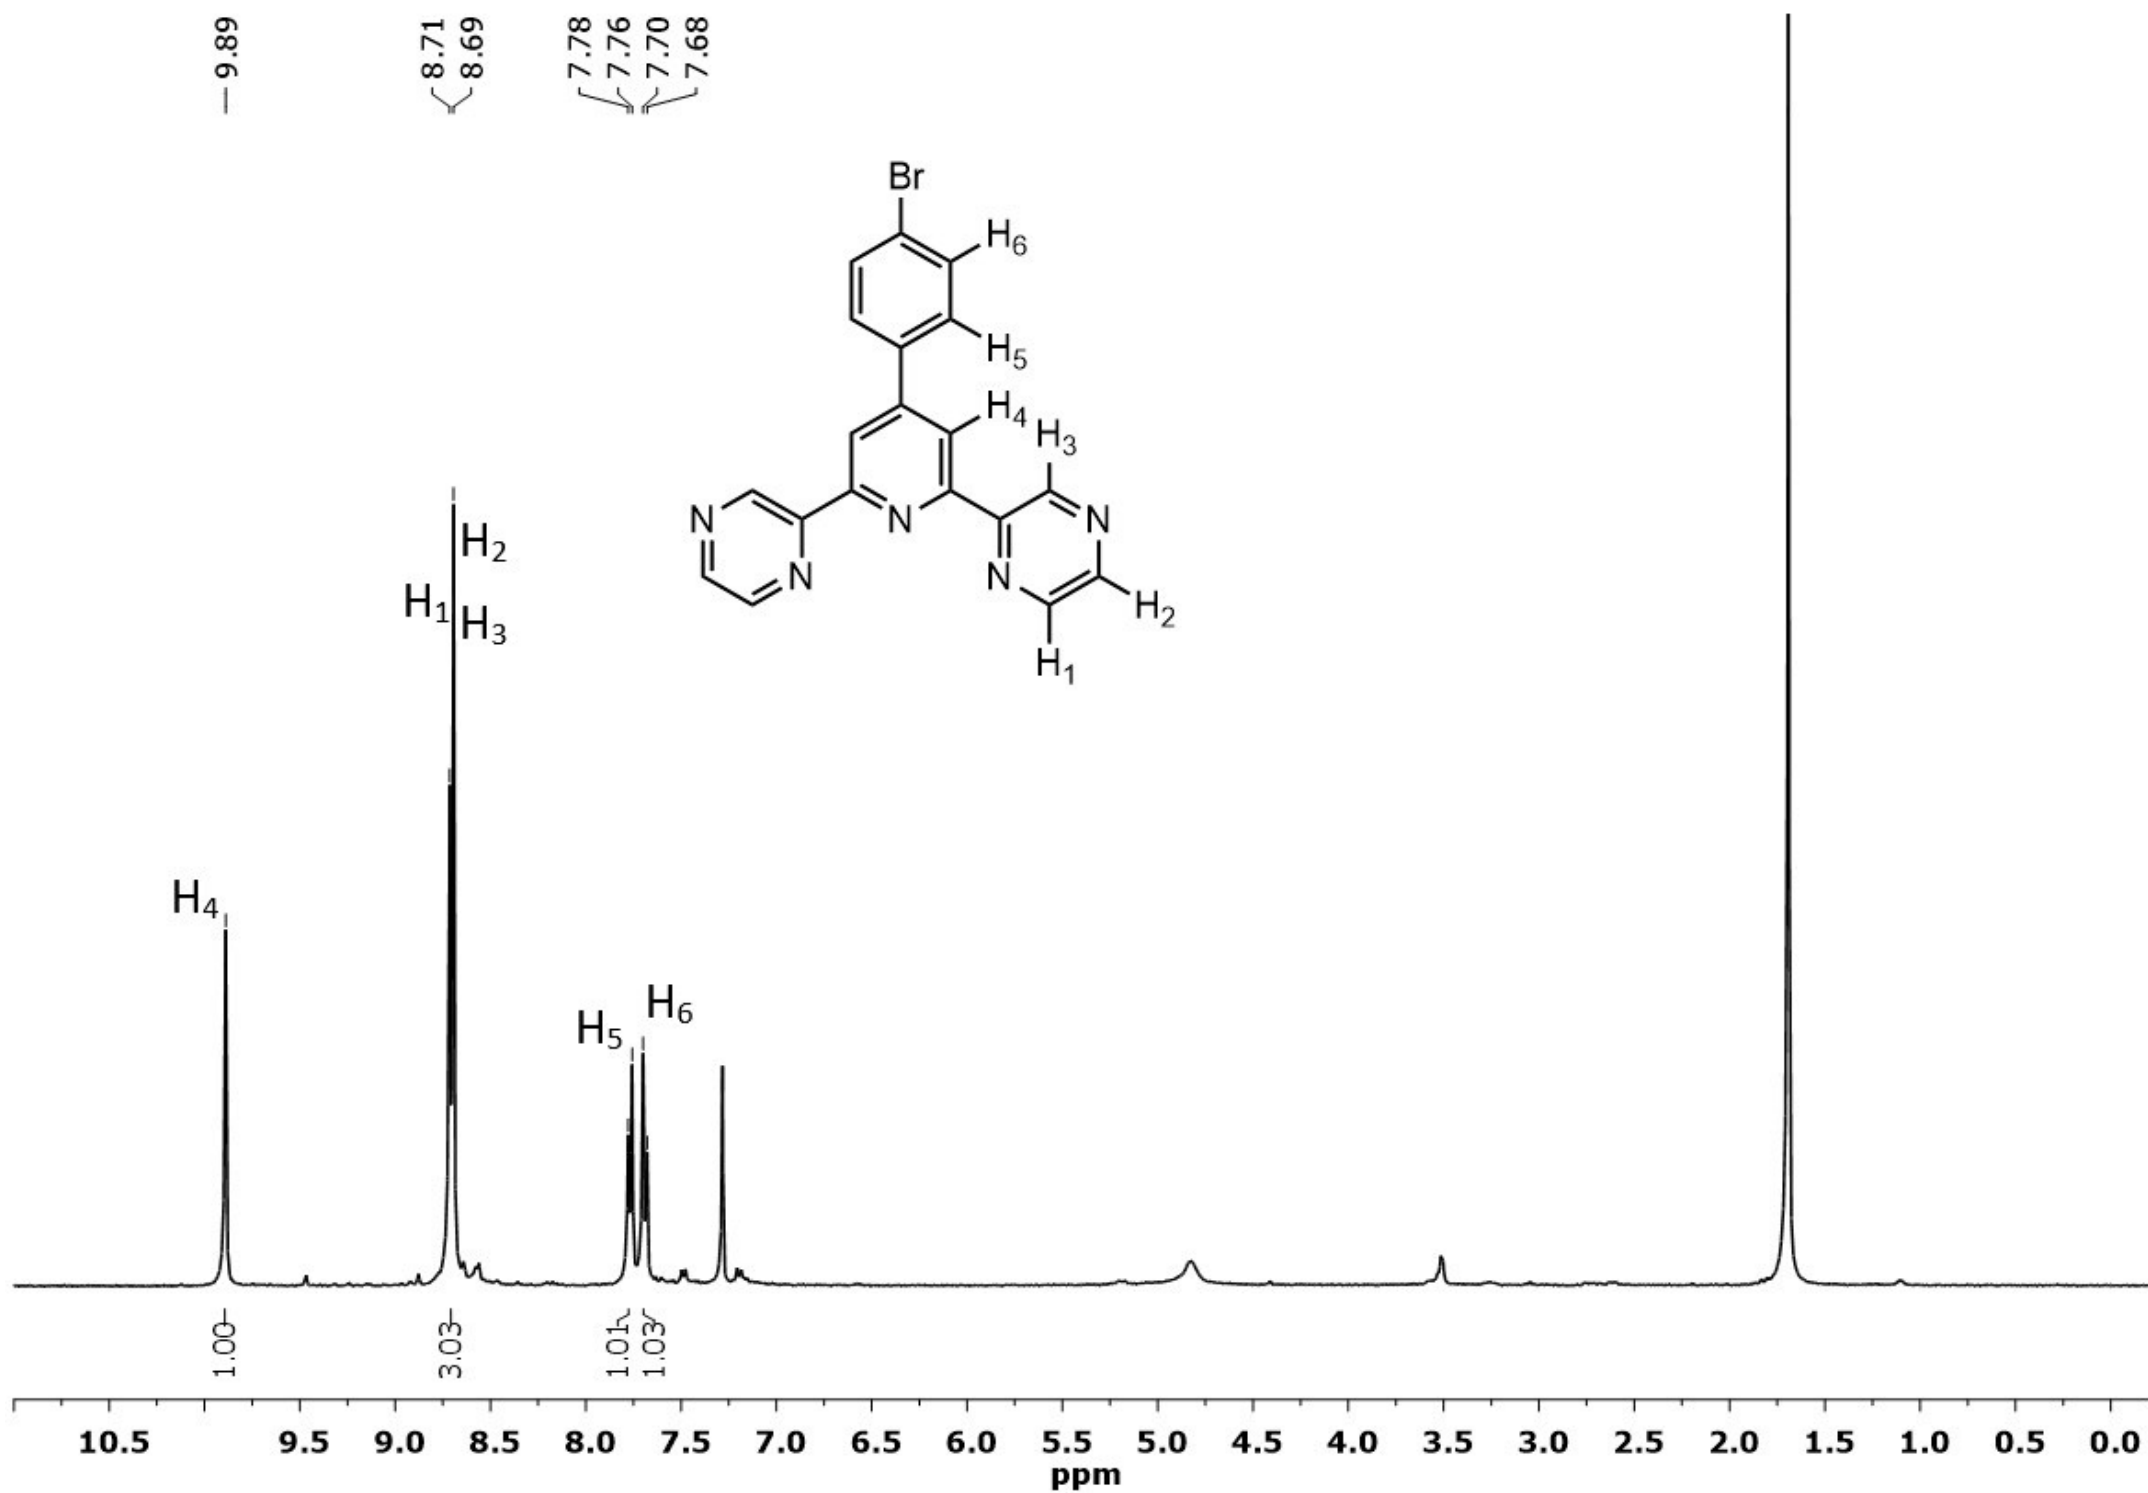

Supplement: c9cc00837c6.pdf [file c9cc00837c6.pdf]

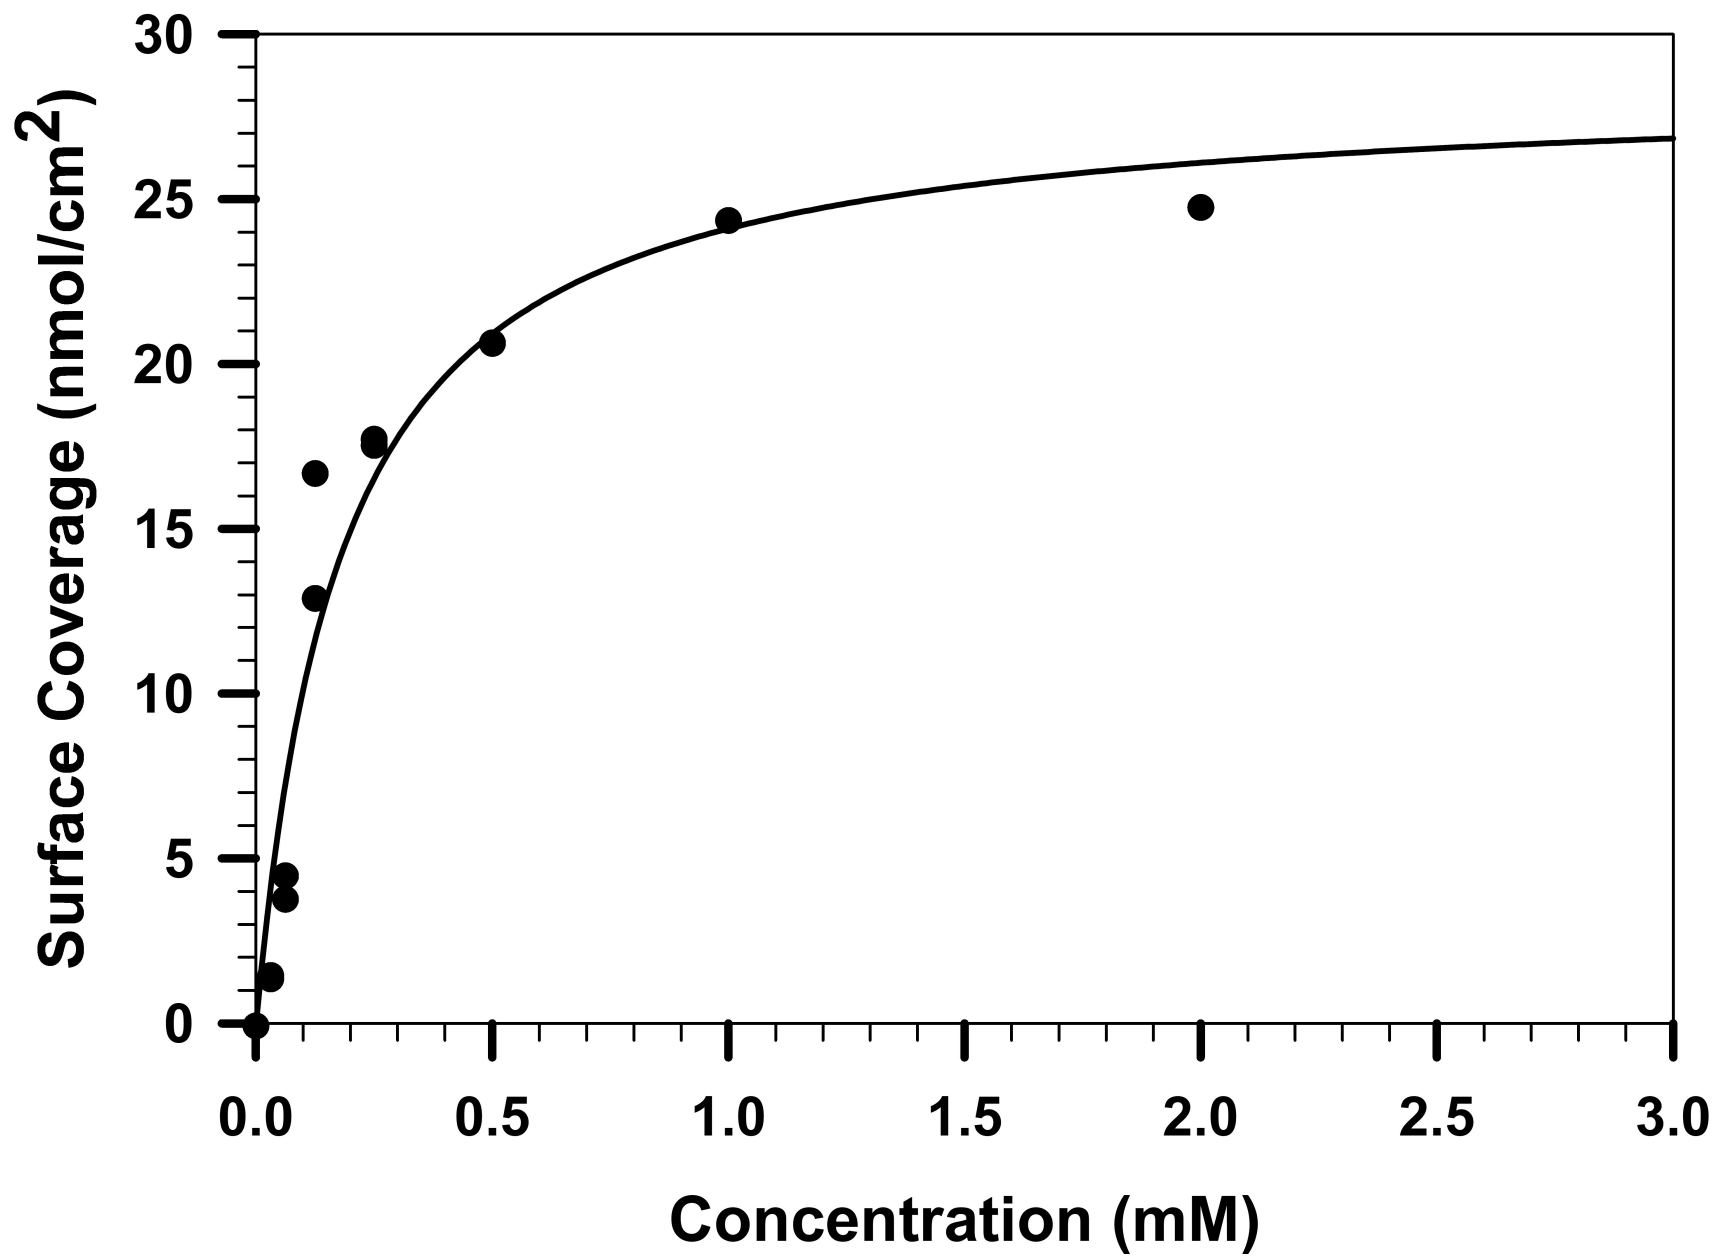

Supplement: c9cc00837c9.pdf [file c9cc00837c9.pdf]
